# Supplementary material
Source: Springer Nature journal article supplement (https://www.springermedizin.de/resource/supplementary/13048_2012_119_MOESM10_ESM.pdf/9664942)

All significant genes

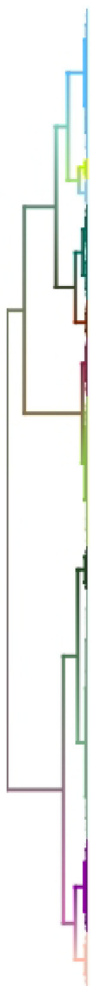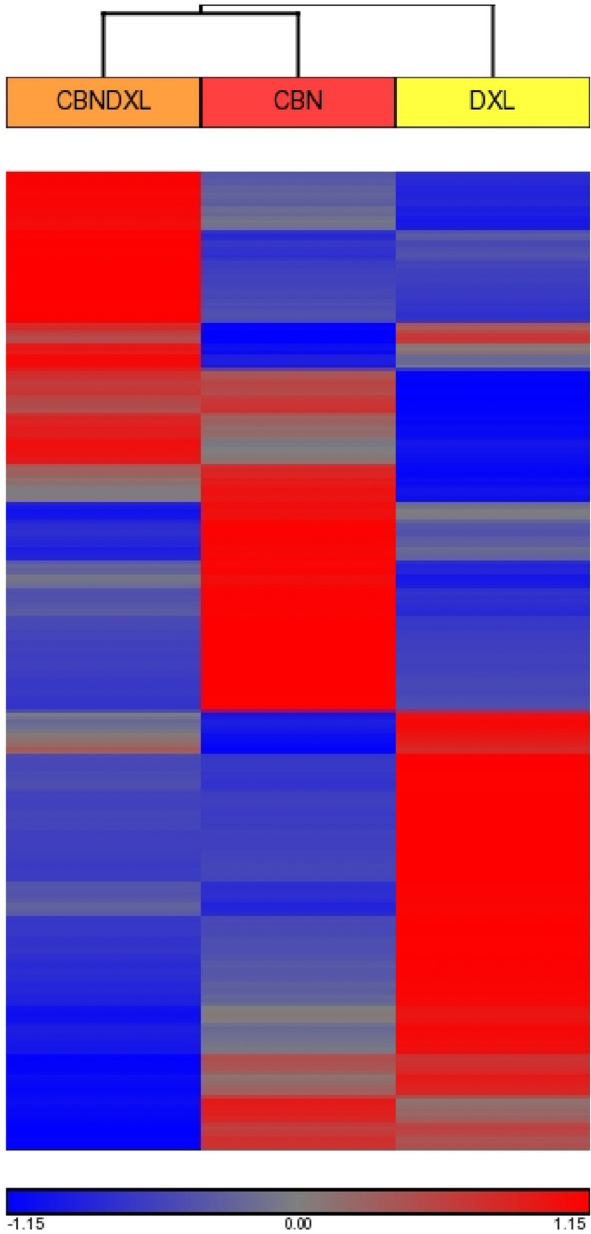

-1.15

0.00

1.15

Supplement: MOESM10 [file 9664942]
